# Supplementary material
Source: PubMed Central journal article supplement (PMC6090363)
Supplement: tpmd170909.SD1.pdf [file tpmd170909.SD1.pdf]

**APPENDIX 1: CASE REPORT**

Study site: \_\_\_\_\_ Residence: \_\_\_\_\_ Date (dd/mm/yyyy): \_\_\_/\_\_\_/\_\_\_

Name (First/Last): \_\_\_\_\_ DOB (dd/mm/yyyy): \_\_\_/\_\_\_/\_\_\_ Gender:  1. Male  2. Female

Occupation:  1. Agriculture  2. Wood extraction  3. Gold extraction  4. Oil industry  5. Researcher  6. Trader  7. Tourism  8. Student  9. Police or armed forces  88. Other (specify): \_\_\_\_\_

**I. PHYSICAL EXAM**

- 1. Temperature: \_\_\_\_\_ °C
  - a.  1. Orally  2. Axillary
- 2. Respiratory Rate: \_\_\_\_\_ /min
- 3. Pulse: \_\_\_\_\_ /min
- 4. Blood Pressure:
  - a. Systolic: \_\_\_\_\_ mm Hg
  - b. Diastolic: \_\_\_\_\_ mm Hg
- 5. Height: \_\_\_\_\_ cm                      6. Weight: \_\_\_\_\_ kg

**Evaluation of systems**

Complete the table and put the condition of the system in the **TYPE** part. If the type is **ABNORMAL**, specify in the next space.

|                                 | Type | Specify if abnormal |
|---------------------------------|------|---------------------|
| 7. General appreciation         |      |                     |
| 8. Skin and annexes             |      |                     |
| 9. Subcutaneous cellular tissue |      |                     |
| 10. Nose                        |      |                     |
| 11. Mouth                       |      |                     |
| 12. Head and neck               |      |                     |
| 13. Lymphatic System            |      |                     |
| 14. Osteomyoarticular System    |      |                     |
| 15. Respiratory                 |      |                     |
| 16. Cardiovascular              |      |                     |
| 17. Abdomen                     |      |                     |
| 18. Genitourinary               |      |                     |
| 19. Neurological                |      |                     |

**Type**  
0. Normal    1. Abnormal

**II. CUTANEOUS LEISHMANIASIS**

- 20. Have you had or do you have any skin lesions, including scars?
  - 0. No → **GO TO SECTION III**
  - 1. Yes → When? (mm/yyyy) \_\_\_/\_\_\_
- 21. Time of the current disease: \_\_\_\_\_  Years  Months
- 22. How many scars do you have? \_\_\_ scars.
  - a. Were those scars caused by a previous leishmaniasis infection?
    - 0. No
    - 1. Yes
    - 99. Don't apply (if the number of scars is zero)
- 23. Have you ever received antileishmanial therapy?
  - 0. No → **GO TO QUESTION 24**
  - 1. Yes
    - a. How many treatments have you received? \_\_\_ treatment(s)
    - b. What drugs did you receive? **READ EACH RESPONSE AND MARK ALL THAT APPLY:**
      - 1. Sodium stibogluconate
      - 2. Pentamidine
      - 3. Paromomycin sulfate
      - 4. Amphotericin B
      - 5. Miltefosine
      - 88. Other (specify): \_\_\_\_\_
    - c. How many days did the last treatment last? \_\_\_\_\_ day(s)
    - d. Did you complete the treatment?
      - 0. No → Specify why not? \_\_\_\_\_
      - 1. Yes → **GO TO QUESTION 24**
    - e. What was the outcome?
      - 1. Cured
      - 2. Treatment failure
      - 3. Relapsing

**CODE**

24. Total number of active lesions: \_\_\_\_ lesion(s)

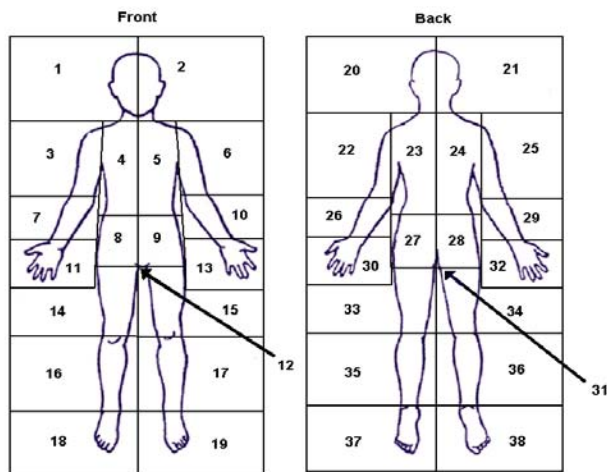

25. Complete the table with all the information from each lesion. Use the figure to localize the lesions on the patient's body.

| #  | Begin. Date (mm/yy) | Type | Localization (code) | Size (mm) | Sample taken | Photo Code |
|----|---------------------|------|---------------------|-----------|--------------|------------|
| 1C |                     |      |                     | /         |              |            |
| 2C |                     |      |                     | /         |              |            |
| 3C |                     |      |                     | /         |              |            |
| 4C |                     |      |                     | /         |              |            |
| 5C |                     |      |                     | /         |              |            |

**Type**

1. Ulcer
2. Nodule
3. Papule
4. Plaque
5. Scar

**Sample taken**

1. Tissue aspirate
2. Lancet sampling
3. Biopsy sampling
4. Filter paper
5. Brush sampling

26. Do you have any skin lesion infected?

0. No  
 1. Yes → What lesion codes? \_\_\_\_/\_\_\_\_/\_\_\_\_

**III. MUCOSAL LEISHMANIASIS**

27. Do you have any mucosal lesions (gums, nose)?

0. No → **GO TO SECTION IV**  
 1. Yes

28. Time of the disease: \_\_\_\_\_  Years  Months.

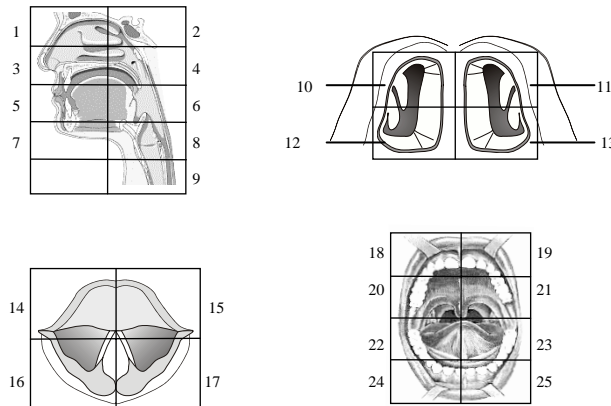

29. Complete the table with all the information from each lesion. Use the figure to localize the lesions.

| #  | Begin. Date (mm/yy) | Type | Localization (code) | Size (mm) | Sample taken | Photo Code |
|----|---------------------|------|---------------------|-----------|--------------|------------|
| 1M |                     |      |                     | /         |              |            |
| 2M |                     |      |                     | /         |              |            |
| 3M |                     |      |                     | /         |              |            |
| 4M |                     |      |                     | /         |              |            |
| 5M |                     |      |                     | /         |              |            |

**Type**

1. Ulcer
2. Nodule
3. Papule
4. Plaque
5. Scar

**Sample taken**

1. Tissue aspirate
2. Lancet sampling
3. Biopsy sampling
4. Filter paper
5. Brush sampling

30. Complete the table with the information about the compromise in the patient's mucosal.

| Structure       | Type | Comments |
|-----------------|------|----------|
| <i>Nose</i>     |      |          |
| a. Nostrils     |      |          |
| b. 1/3 front    |      |          |
| c. Septum nasal |      |          |
| d. Turbinates   |      |          |
| <i>Mouth</i>    |      |          |
| e. Lips         |      |          |
| f. Palate       |      |          |
| g. Uvula        |      |          |
| h. Pharynx      |      |          |
| i. Epiglottis   |      |          |
| j. Vocal cords  |      |          |

**Type of compromise**

0. No compromise
1. Erythema
2. Edematous
3. Inflammation
4. Ulcerative

**CODE**

#### IV. EPIDEMIOLOGY

31. Places of residence in the last 10 years (stay more than 1 month)

| # | From (M/Y) | To (M/Y) | Dpt. | Province | Dist. | Occup. |
|---|------------|----------|------|----------|-------|--------|
| A |            |          |      |          |       |        |
| B |            |          |      |          |       |        |
| C |            |          |      |          |       |        |
| D |            |          |      |          |       |        |
| E |            |          |      |          |       |        |
| F |            |          |      |          |       |        |
| G |            |          |      |          |       |        |
| H |            |          |      |          |       |        |
| I |            |          |      |          |       |        |
| J |            |          |      |          |       |        |

**Occupation:**

- |                            |                    |                           |
|----------------------------|--------------------|---------------------------|
| 1. Agriculture             | 2. Wood extraction | 3. Gold extraction        |
| 4. Oil industry            | 5. Researcher      | 6. Trader                 |
| 7. Tourism                 | 8. Student         | 9. Police or armed forces |
| 88. Other (specify): _____ |                    |                           |

Please, answer these questions about your practices and behaviors during your daily routine: MARK ONLY ONE ANSWER PER QUESTION:

|       |        |           |       |        |
|-------|--------|-----------|-------|--------|
| 1     | 2      | 3         | 4     | 5      |
| _____ | _____  | _____     | _____ | _____  |
| Never | Rarely | Sometimes | Often | Always |

|                                                      | Rating | Does not apply |
|------------------------------------------------------|--------|----------------|
| 32. Use mosquito repellent                           |        |                |
| 33. Use long sleeves                                 |        |                |
| 34. Use insecticide-impregnated clothing             |        |                |
| 35. Have contact with dogs                           |        |                |
| 36. Have contact with other domestic animals         |        |                |
| 37. Were at open field on the dawn or sunset         |        |                |
| 38. Use bed nets to sleep                            |        |                |
| 39. Sleep in rooms or places with open windows       |        |                |
| 40. Sleep in areas near to rainforest or farm fields |        |                |
| 41. Have mosquito bites                              |        |                |
| 42. Have bites from "manta blanca" or "titira"       |        |                |

43. Did you spray your bedroom with insecticide at the last six months?

0. No  
 1. Yes.  
 98. Don't know

#### V. LABORATORY

**DON'T ASK TO THE PATIENT. COMPLETE THIS INFORMATION FROM THE LABORATORY RESULTS.**

|                        | Result |
|------------------------|--------|
| 44. Direct observation |        |
| 45. Leishmanina        |        |
| 46. Cultivo            |        |
| 47. k-DNA              |        |
| 48. Real time PCR      |        |

**Result:**

0. Negative  
 1. Positive  
 99. Not performed

49. Leishmania species causing the current episode:

1. *L. braziliensis*  
 2. *L. peruviana*  
 3. *L. guyanensis*  
 4. *L. panamensis*  
 5. *L. lainsoni*  
 98. Don't know

|      |
|------|
| CODE |
|      |
